# Supplementary material for: Catalytic conversion of CHx and CO2 on non-noble metallic impurities in graphene
Source: Royal Society of Chemistry journal article supplement (doi:10.1039/c6cp01403h), 2016-01-01
Supplement: c6cp01403h1.pdf [file c6cp01403h1.pdf]

**Table S1** The adsorption energy ( $E_{\text{ads}}$ , eV), bond length between Fe and  $\text{CH}_x$  ( $d_{\text{Fe-CH}_x}$ , Å), transferred electrons from the substrates to the  $\text{CH}_x$  ( $\Delta q_{\text{CH}_x}$ , e), and total magnetic moment ( $m$ ,  $\mu_{\text{B}}$ ) for the adsorbed  $\text{CH}_x$  ( $x=0\sim 4$ ) on the Fe-graphene systems (including the top site of metal atom and metal-carbon bond).

| Systems                  |                          | Fe-graphene                 |                                 |                           |
|--------------------------|--------------------------|-----------------------------|---------------------------------|---------------------------|
| $\text{CH}_x$<br>species | $E_{\text{ads}}$<br>(eV) | $d_{\text{Fe-CH}_x}$<br>(Å) | $\Delta q_{\text{CH}_x}$<br>(e) | M<br>( $\mu_{\text{B}}$ ) |
| C                        | 3.42                     | 1.72                        | +0.48                           | 1.70                      |
|                          | 4.57                     | 1.61                        | +0.47                           | 0.00                      |
| CH                       | 3.70                     | 1.78                        | +0.47                           | 1.00                      |
|                          | 4.37                     | 1.82                        | +0.40                           | 3.00                      |
| $\text{CH}_2$            | 3.01                     | 1.88                        | +0.43                           | 2.00                      |
|                          | 4.00                     | 1.97                        | +0.24                           | 2.00                      |
| $\text{CH}_3$            | 2.40                     | 1.96                        | +0.40                           | 1.00                      |
|                          | 1.38                     | 2.18                        | +0.22                           | 1.00                      |
| $\text{CH}_4$            | 0.17                     | 2.44                        | -0.03                           | 0.00                      |
